# Supplementary material for: Influence of Aliphatic Chain Length on Structural, Thermal and Electrochemical Properties of n-alkylene Benzyl Alcohols: A Study of the Odd–Even Effect
Source: MDPI journal article supplement (doi:10.3390/molecules27123781), 2022-06-12
Supplement: s1 [file s1]

Electronic Supplementary Information

# Influence of Aliphatic Chain Length on Structural, Thermal and Electrochemical Properties of *n*-alkylene Benzyl Alcohols: A Study of the Odd–Even Effect

Tomislav Balić <sup>1</sup>, Marija Paurević <sup>1</sup>, Marta Počkaj <sup>2</sup>, Martina Medvidović-Kosanović <sup>1,\*</sup>, Dominik Goman <sup>1</sup>, Aleksandar Széchenyi <sup>1</sup>, Zsolt Preisz <sup>3,4</sup> and Sándor Kunsági-Máté <sup>3,5</sup>

<sup>1</sup> Department of Chemistry, Josip Juraj Strossmayer University of Osijek, Cara Hadrijana 8/A, 31000 Osijek, Croatia; tombalic@kemija.unios.hr (T.B.); mstivo@kemija.unios.hr (M.P.); dgoman@kemija.unios.hr (D.G.); szealex@kemija.unios.hr (A.S.)

<sup>2</sup> Faculty of Chemistry and Chemical Technology, University of Ljubljana, Večna pot 113, 1000 Ljubljana, Slovenia; marta.pockaj@fkkt.uni-lj.si

<sup>3</sup> Faculty of Pharmacy, Institute of Organic and Medicinal Chemistry, University of Pécs, Szigeti 12, 7624 Pécs, Hungary; preisz.zsolt@gmail.com (Z.P.); kunsagi-mate.sandor@gytk.pte.hu (S.K.-M.)

<sup>4</sup> Department of Physical Chemistry and Materials Science, Faculty of Sciences, University of Pécs, Ifjúság 6, 7624 Pécs, Hungary

<sup>5</sup> János Szentágothai Research Center, University of Pécs, Ifjúság 20, 7624 Pécs, Hungary

\* Correspondence: mmkosano@kemija.unios.hr; Tel.: +385-31-399-959; Fax: +385-31-399-969

## Contents

|                                                                                                                                                                                                                                                                                                |    |
|------------------------------------------------------------------------------------------------------------------------------------------------------------------------------------------------------------------------------------------------------------------------------------------------|----|
| <b>Figure S1.</b> Structure overlay of <b>Do6OH I</b> conformer A (red) and B (green).....                                                                                                                                                                                                     | 4  |
| <b>Figure S2.</b> Structure overlay of <b>Do6OH I</b> conformer A (red) and <b>Do6OH II</b> (blue). ....                                                                                                                                                                                       | 4  |
| <b>Table S1.</b> Crystallographic data and structure refinement details for <b>Do4OH</b> , <b>Do5OH</b> , <b>Do6OH I</b> and <b>Do6OH II</b> . ....                                                                                                                                            | 5  |
| <b>Scheme S1.</b> Synthetic route for the preparation of compounds with NMR numbering scheme. ....                                                                                                                                                                                             | 6  |
| Synthesis procedure.....                                                                                                                                                                                                                                                                       | 6  |
| Preparation of 1,2-bis[2-(hydroxymethyl)phenoxy]butylene ( <b>Do4OH</b> ) .....                                                                                                                                                                                                                | 6  |
| Preparation of 1,2-bis[2-(hydroxymethyl)phenoxy]pentylene ( <b>Do5OH</b> ) .....                                                                                                                                                                                                               | 6  |
| Preparation of 1,2-bis[2-(hydroxymethyl)phenoxy]hexylene ( <b>Do6OH</b> ).....                                                                                                                                                                                                                 | 6  |
| <b>Table S2.</b> Selected interatomic bond distances (Å), valence angles (°) and torsion angles (°) for <b>Do4OH</b> , <b>Do5OH</b> , <b>Do6OH I</b> and <b>Do6OH II</b> .....                                                                                                                 | 6  |
| <b>Figure S3.</b> Hirshfeld surfaces for <b>Do4OH</b> , <b>Do5OH</b> , <b>Do6OH I</b> and <b>Do6OH II</b> plotted over $d_{\text{norm}}$ . In case of <b>Do4OH</b> and <b>Do6OH I</b> , two symmetry independent molecules are present in the structure and hence HS of both are depicted..... | 10 |
| <b>Figure S4.</b> The full 2D fingerprint plots of (a) <b>Do4OH</b> , (b) <b>Do5OH</b> , (c) <b>Do6OH I</b> and (d) <b>Do6OH II</b> . ....                                                                                                                                                     | 11 |
| <b>Figure S5.</b> TG (black) and DSC (red) curves of <b>Do4OH</b> . ....                                                                                                                                                                                                                       | 12 |
| <b>Figure S6.</b> TG (black) and DSC (red) curves of <b>Do5OH</b> . ....                                                                                                                                                                                                                       | 12 |
| <b>Table S3.</b> Thermodynamic data of the DSC measurements for <b>Do4OH</b> , <b>Do5OH</b> and <b>Do6OH (Forms I and II)</b> . ....                                                                                                                                                           | 12 |
| <b>Figure S7.</b> Linear Gibbs free energy functions for <b>Forms I and II</b> . ....                                                                                                                                                                                                          | 13 |
| <b>Figure S8.</b> IR spectrum of <b>Do4OH</b> . ....                                                                                                                                                                                                                                           | 14 |
| <b>Figure S9.</b> IR spectrum of <b>Do5OH</b> . ....                                                                                                                                                                                                                                           | 15 |
| <b>Fig. S10.</b> IR spectrum of <b>Do6OH I</b> . ....                                                                                                                                                                                                                                          | 16 |
| <b>Fig. S11.</b> IR spectrum of <b>Do6OH II</b> . ....                                                                                                                                                                                                                                         | 17 |
| <b>Fig. S12.</b> Spectra overlay of <b>Do6OH I</b> (black) and <b>II</b> (red) .....                                                                                                                                                                                                           | 18 |
| <b>Fig. S13.</b> $^1\text{H}$ NMR spectra of <b>Do4OH</b> . ....                                                                                                                                                                                                                               | 19 |
| <b>Fig. S14.</b> $^1\text{H}$ NMR spectra of <b>Do5OH</b> . ....                                                                                                                                                                                                                               | 20 |
| <b>Fig. S15.</b> $^1\text{H}$ NMR spectra of <b>Do6OH</b> . ....                                                                                                                                                                                                                               | 21 |
| <b>Table S4.</b> Molecular pairs interaction energies (kJ/mol) for <b>Do4OH</b> . ....                                                                                                                                                                                                         | 22 |
| <b>Table S5.</b> Molecular pairs interaction energies (kJ/mol) for <b>Do5OH</b> . ....                                                                                                                                                                                                         | 23 |
| <b>Table S6.</b> Molecular pairs interaction energies (kJ/mol) for <b>Do6OH I</b> . ....                                                                                                                                                                                                       | 24 |

---

|                                                                                          |    |
|------------------------------------------------------------------------------------------|----|
| <b>Table S7.</b> Molecular pairs interaction energies (kJ/mol) for <b>Do6OH II</b> ..... | 25 |
|------------------------------------------------------------------------------------------|----|

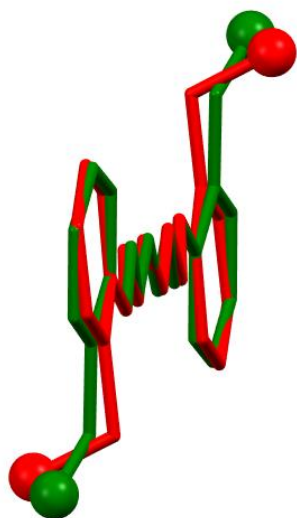

**Figure S1.** Structure overlay of **Do6OH I** conformer A (red) and B (green).

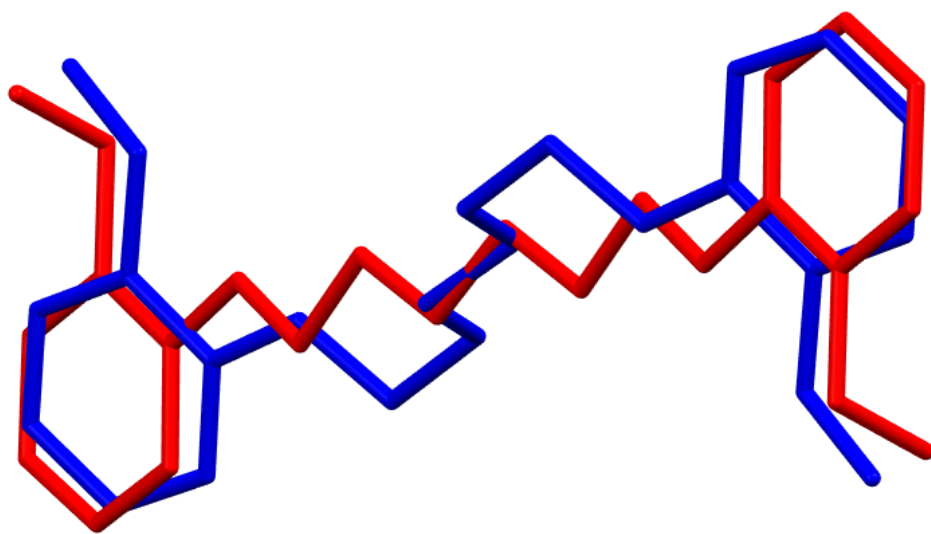

**Figure S2.** Structure overlay of **Do6OH I** conformer A (red) and **Do6OH II** (blue).

**Table S1.** Crystallographic data and structure refinement details for **Do4OH**, **Do5OH**, **Do6OH I** and **Do6OH II**.

|                                             |                                                                                                                                                     |                                                                                                   |                                                               |                                                               |
|---------------------------------------------|-----------------------------------------------------------------------------------------------------------------------------------------------------|---------------------------------------------------------------------------------------------------|---------------------------------------------------------------|---------------------------------------------------------------|
| Identification code                         | Do4OH                                                                                                                                               | Do5OH                                                                                             | Do6OH I                                                       | Do6OH II                                                      |
| Empirical formula                           | C <sub>18</sub> H <sub>22</sub> O <sub>4</sub>                                                                                                      | C <sub>19</sub> H <sub>24</sub> O <sub>4</sub>                                                    | C <sub>20</sub> H <sub>26</sub> O <sub>4</sub>                | C <sub>20</sub> H <sub>26</sub> O <sub>4</sub>                |
| Formula weight                              | 302.35                                                                                                                                              | 316.38                                                                                            | 330.41                                                        | 330.41                                                        |
| Temperature/K                               | 150.15                                                                                                                                              | 150.15                                                                                            | 150.15                                                        | 150.15                                                        |
| Crystal system                              | monoclinic                                                                                                                                          | orthorhombic                                                                                      | monoclinic                                                    | orthorhombic                                                  |
| Space group                                 | <i>I</i> 2/a                                                                                                                                        | <i>P</i> bcn                                                                                      | <i>P</i> 2 <sub>1</sub> /c                                    | <i>P</i> bca                                                  |
| <i>a</i> /Å                                 | 25.2277(11)                                                                                                                                         | 24.912(4)                                                                                         | 11.9940(19)                                                   | 4.6281(6)                                                     |
| <i>b</i> /Å                                 | 5.0156(2)                                                                                                                                           | 4.7195(4)                                                                                         | 20.4401(18)                                                   | 14.3917(18)                                                   |
| <i>c</i> /Å                                 | 25.7097(13)                                                                                                                                         | 14.0976(13)                                                                                       | 7.5411(8)                                                     | 26.534(4)                                                     |
| $\alpha$ /°                                 | 90                                                                                                                                                  | 90                                                                                                | 90                                                            | 90                                                            |
| $\beta$ /°                                  | 92.351(4)                                                                                                                                           | 90                                                                                                | 91.629(14)                                                    | 90                                                            |
| $\gamma$ /°                                 | 90                                                                                                                                                  | 90                                                                                                | 90                                                            | 90                                                            |
| Volume/Å <sup>3</sup>                       | 3250.4(3)                                                                                                                                           | 1657.5(3)                                                                                         | 1848.0(4)                                                     | 1767.3(4)                                                     |
| <i>Z</i>                                    | 8                                                                                                                                                   | 4                                                                                                 | 4                                                             | 4                                                             |
| $\rho_{\text{calc}}/\text{cm}^3$            | 1.236                                                                                                                                               | 1.268                                                                                             | 1.188                                                         | 1.242                                                         |
| $\mu/\text{mm}^{-1}$                        | 0.086                                                                                                                                               | 0.088                                                                                             | 0.081                                                         | 0.085                                                         |
| <i>F</i> (000)                              | 1296.0                                                                                                                                              | 680.0                                                                                             | 712.0                                                         | 712.0                                                         |
| Crystal size/mm <sup>3</sup>                | 0.35 × 0.15 × 0.05                                                                                                                                  | 0.3 × 0.15 × 0.1                                                                                  | 0.4 × 0.25 × 0.15                                             | 0.4 × 0.1 × 0.1                                               |
| Radiation                                   | Mo K $\alpha$ ( $\lambda$ = 0.71073) |                                                                                                   |                                                               |                                                               |
| 2 $\theta$ range for data collection/°      | 6.344 to 60.614                                                                                                                                     | 5.78 to 60.368                                                                                    | 5.238 to 60.61                                                | 5.662 to 60.944                                               |
| Index ranges                                | -34 ≤ <i>h</i> ≤ 35, -6 ≤ <i>k</i> ≤ -29 ≤ <i>h</i> ≤ 34, -6 ≤ <i>k</i> ≤ -16 ≤ <i>h</i> ≤ 11, -27 ≤ <i>k</i> ≤ 7, -30 ≤ <i>l</i> ≤ 36              | -29 ≤ <i>h</i> ≤ 34, -6 ≤ <i>k</i> ≤ -16 ≤ <i>h</i> ≤ 11, -27 ≤ <i>k</i> ≤ 7, -30 ≤ <i>l</i> ≤ 36 | -16 ≤ <i>h</i> ≤ 11, -27 ≤ <i>k</i> ≤ 7, -30 ≤ <i>l</i> ≤ 36  | -6 ≤ <i>h</i> ≤ 6, -17 ≤ <i>k</i> ≤ 20, -36 ≤ <i>l</i> ≤ 32   |
| Reflections collected                       | 14032                                                                                                                                               | 13429                                                                                             | 16844                                                         | 14832                                                         |
| Independent reflections                     | 4405 [R <sub>int</sub> = 0.0418, R <sub>sigma</sub> = 0.0580]                                                                                       | 2335 [R <sub>int</sub> = 0.0297, R <sub>sigma</sub> = 0.0231]                                     | 4979 [R <sub>int</sub> = 0.0285, R <sub>sigma</sub> = 0.0297] | 2525 [R <sub>int</sub> = 0.0429, R <sub>sigma</sub> = 0.0320] |
| Data/restraints/parameters                  | 4405/0/207                                                                                                                                          | 2335/0/109                                                                                        | 4979/0/225                                                    | 2525/0/113                                                    |
| Goodness-of-fit on F <sup>2</sup>           | 1.056                                                                                                                                               | 1.044                                                                                             | 1.034                                                         | 1.053                                                         |
| Final R indexes [I >= 2 $\sigma$ (I)]       | R <sub>1</sub> = 0.0695, wR <sub>2</sub> = 0.1874                                                                                                   | R <sub>1</sub> = 0.0418, wR <sub>2</sub> = 0.1015                                                 | R <sub>1</sub> = 0.0456, wR <sub>2</sub> = 0.1060             | R <sub>1</sub> = 0.0457, wR <sub>2</sub> = 0.1072             |
| Final R indexes [all data]                  | R <sub>1</sub> = 0.1014, wR <sub>2</sub> = 0.2102                                                                                                   | R <sub>1</sub> = 0.0545, wR <sub>2</sub> = 0.1112                                                 | R <sub>1</sub> = 0.0614, wR <sub>2</sub> = 0.1168             | R <sub>1</sub> = 0.0718, wR <sub>2</sub> = 0.1197             |
| Largest diff. peak/hole / e Å <sup>-3</sup> | 0.36/-0.24                                                                                                                                          | 0.22/-0.19                                                                                        | 0.26/-0.24                                                    | 0.19/-0.19                                                    |

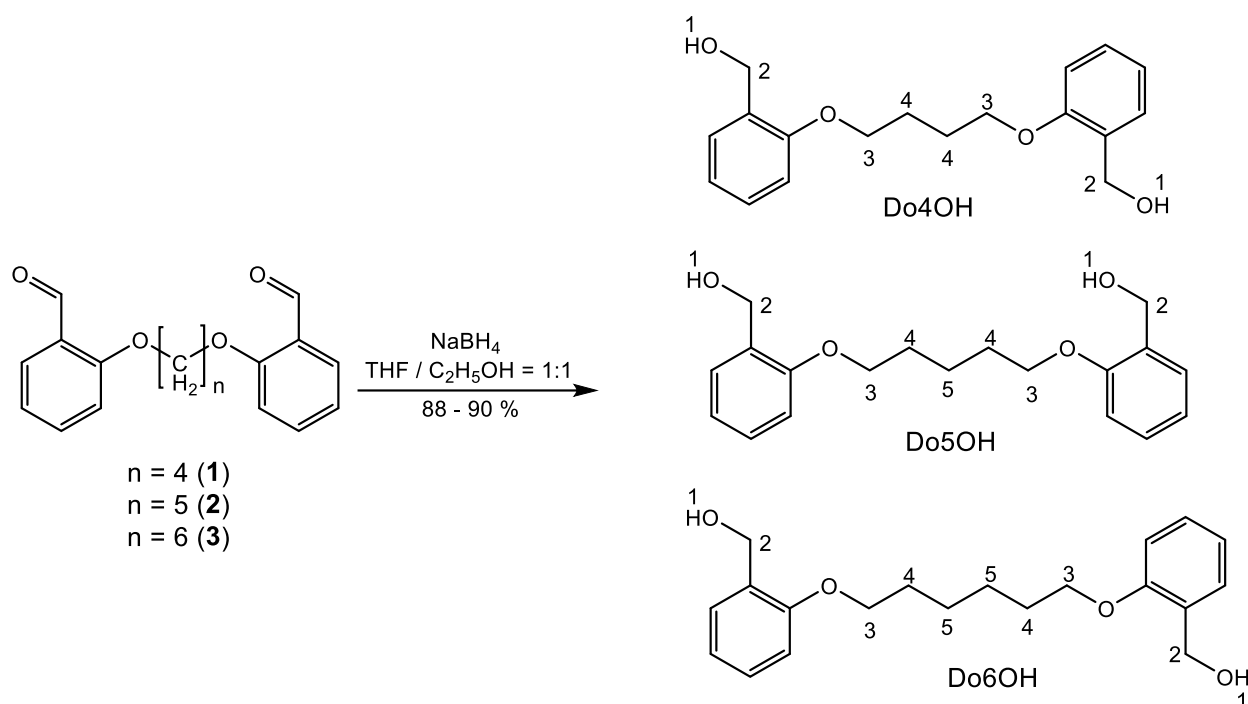

**Scheme S1.** Synthetic route for the preparation of compounds with NMR numbering scheme.

#### Synthesis procedure

##### Preparation of 1,2-bis[2-(hydroxymethyl)phenoxy]butylene (**Do4OH**)

Sodium borohydride (304.4 mg, 8.05 mmol) was slowly added to a THF/ $\text{C}_2\text{H}_5\text{OH}$  (15 mL, in 1:1 ratio) solution of dialdehyde **1** (1 g, 3.35 mmol) with stirring for 2.5 hours in the ice-water bath. The reaction mixture was refluxed for 10 hours. The solvent was then evaporated and 15 mL of  $\text{H}_2\text{O}$  was added to the residue. The resulting solution was extracted with  $\text{CH}_2\text{Cl}_2$  and the organic phase was dried over anhydrous  $\text{Na}_2\text{SO}_4$ . After removing  $\text{CH}_2\text{Cl}_2$ , a white solid of 1,2-bis[2-(hydroxymethyl)phenoxy]butylene was obtained. Yield: 887.5 mg (88 %).  $^1\text{H}$  NMR (DMSO)  $\delta$  / ppm: 7.37 (dd, 2H, H-Ar), 6.91-7.19 (m, 6H, H-Ar), 4.94-4.96 (t, 2H, H-1), 4.51 (d, 4H, H-2), 4.03 (t, 4H, H-3), 1.88 (m, 4H, H-4). An identical procedure was used to obtain **Do5OH** and **Do6OH**.

##### Preparation of 1,2-bis[2-(hydroxymethyl)phenoxy]pentylene (**Do5OH**)

Yield: 900 mg (88 %).  $^1\text{H}$  NMR (DMSO)  $\delta$  / ppm: 7.33 (dd, 2H, H-Ar), 7.12 (td, 2H, H-Ar), 6.86-6.88 (m, 4H, H-Ar), 4.90 (t, 2H, H-1), 4.46 (d, 4H, H-2), 3.93 (t, 4H, H-3), 1.74 (quin, 4H, H-4), 1.52-1.57 (m, 2H, H-5).

##### Preparation of 1,2-bis[2-(hydroxymethyl)phenoxy]hexylene (**Do6OH**)

Yield: 559 mg (90 %).  $^1\text{H}$  NMR (DMSO)  $\delta$  / ppm: 7.35-7.37 (dd, 2H, H-Ar), 7.16-7.19 (td, 2H, H-Ar), 6.89-6.92 (m, 4H, H-Ar), 4.93-4.95 (t, 2H, H-1), 4.91-4.50 (d, 4H, H-2), 3.96-3.98 (t, 4H, H-3), 1.73-1.75 (m, 4H, H-4), 1.49 (m, 4H, H-5).

**Table S2.** Selected interatomic bond distances (Å), valence angles ( $^\circ$ ) and torsion angles ( $^\circ$ ) for **Do4OH**, **Do5OH**, **Do6OH I** and **Do6OH II**.

| Selected bond distances (Å) |          | Selected bond angles (°) |            | Selected torsion angles (°) |            |
|-----------------------------|----------|--------------------------|------------|-----------------------------|------------|
| Do4OH                       |          |                          |            |                             |            |
| C1-O1                       | 1.426(3) | O1-C1-C2                 | 112.15(19) | O1-C1-C2-C3                 | -2.6(3)    |
| C1-C2                       | 1.510(3) | C3-C2-C7                 | 118.6(2)   | O1-C1-C2-C7                 | 177.15(18) |

|                                         |            |               |            |                  |             |
|-----------------------------------------|------------|---------------|------------|------------------|-------------|
| C2-C3                                   | 1.384(3)   | C3-C2-C1      | 122.5(2)   | C7-C2-C3-C4      | 0.7(3)      |
| C2-C7                                   | 1.402(3)   | C7-C2-C1      | 118.85(19) | C1-C2-C3-C4      | -179.5(2)   |
| C3-C4                                   | 1.392(3)   | C2-C3-C4      | 120.7(2)   | C2-C3-C4-C       | 50.2(4)     |
| C4-C5                                   | 1.369(4)   | C5-C4-C3      | 120.0(2)   | C3-C4-C5-C6      | -0.3(4)     |
| C5-C6                                   | 1.395(3)   | C4-C5-C6      | 120.7(2)   | C4-C5-C6-C7      | -0.7(3)     |
| C6-C7                                   | 1.385(3)   | C7-C6-C5      | 119.1(2)   | C5-C6-C7-O2      | -177.22(19) |
| C7-O2                                   | 1.372(3)   | O2-C7-C6      | 124.4(2)   | C5-C6-C7-C       | 21.7(3)     |
| C8-O2                                   | 1.431(3)   | O2-C7-C2      | 114.70(19) | C3-C2-C7-O2      | 177.30(18)  |
| C8-C9                                   | 1.505(3)   | C6-C7-C2      | 120.9(2)   | C1-C2-C7-O2      | -2.5(39)    |
| C9-C9#1                                 | 1.517(4)   | O2-C8-C9      | 106.78(18) | C3-C2-C7-C6      | -1.7(3)     |
| C10-O3                                  | 1.425(3)   | C8-C9-C9#1    | 111.7(2)   | C1-C2-C7-C6      | 178.5(2)    |
| C10-C11                                 | 1.500(3)   | O3-C10-C11    | 112.68(19) | O2-C8-C9-C9#1    | -179.4(2)   |
| C11-C12                                 | 1.377(3)   | C12-C11-C16   | 118.1(2)   | O3-C10-C11-C12   | -0.9(3)     |
| C11-C16                                 | 1.413(3)   | C12-C11-C10   | 123.4(2)   | O3-C10-C11-C16   | 177.9(2)    |
| C12-C13                                 | 1.382(4)   | C16-C11-C10   | 118.5(2)   | C16-C11-C12-C1   | 31.1(3)     |
| C13-C14                                 | 1.387(4)   | C11-C12-C13   | 121.5(2)   | C10-C11-C12-C13  | 179.9(2)    |
| C14-C15                                 | 1.382(4)   | C12-C13-C14   | 119.5(2)   | C11-C12-C13-C1   | 40.1(4)     |
| C15-C16                                 | 1.379(3)   | C15-C14-C13   | 120.5(2)   | C12-C13-C14-C15  | -0.5(4)     |
| C16-O4                                  | 1.370(3)   | C16-C15-C14   | 119.5(2)   | C13-C14-C15-C16  | -0.3(4)     |
| C17-O4                                  | 1.431(3)   | O4-C16-C15    | 124.9(2)   | C14-C15-C16-O4   | -178.0(2)   |
| C17-C18                                 | 1.509(4)   | O4-C16-C11    | 114.19(19) | C14-C15-C16-C11  | 1.6(3)      |
| C18-C18#2                               | 1.518(5)   | C15-C16-C11   | 120.9(2)   | C12-C11-C16-O4   | 177.69(19)  |
|                                         |            | O4-C17-C18    | 106.76(19) | C10-C11-C16-O4   | -1.2(3)     |
|                                         |            | C17-C18-C18#2 | 111.7(3)   | C12-C11-C16-C15  | -1.9(3)     |
|                                         |            | C1-O1-H1      | 105.7(18)  | C10-C11-C16-C15  | 179.2(2)    |
|                                         |            | C7-O2-C8      | 117.63(17) | O4-C17-C18-C18#2 | 177.7(2)    |
|                                         |            | C16-O4-C17    | 118.04(17) | C6-C7-O2-C8      | 0.1(3)      |
|                                         |            |               |            | C2-C7-O2-C8      | -178.91(18) |
|                                         |            |               |            | C9-C8-O2-C7      | 175.43(17)  |
|                                         |            |               |            | C15-C16-O4-C17   | 1.1(39)     |
|                                         |            |               |            | C11-C16-O4-C17   | -178.45(19) |
|                                         |            |               |            | C18-C17-O4-C16   | 174.46(19)  |
| #1 -x+1,-y+1,-z #2 -x+1/2,-y+5/2,-z+1/2 |            |               |            |                  |             |
| <b>Do5OH</b>                            |            |               |            |                  |             |
| C1-O1                                   | 1.4239(13) | O1-C1-C2      | 113.59(10) | O1-C1-C2-C3      | 14.46(16)   |
| C1-C2                                   | 1.5080(16) | C3-C2-C7      | 118.59(11) | O1-C1-C2-C7      | -166.02(10) |
| C2-C3                                   | 1.3897(16) | C3-C2-C1      | 123.05(11) | C7-C2-C3-C4      | -0.28(17)   |

|                  |            |              |            |                 |             |
|------------------|------------|--------------|------------|-----------------|-------------|
| C2-C7            | 1.3998(16) | C7-C2-C1     | 118.36(10) | C1-C2-C3-C4     | 179.24(11)  |
| C3-C4            | 1.3921(18) | C2-C3-C4     | 121.20(12) | C2-C3-C4-C5     | 0.68(18)    |
| C4-C5            | 1.3788(19) | C5-C4-C3     | 119.32(11) | C3-C4-C5-C6     | 0.04(18)    |
| C5-C6            | 1.3917(17) | C4-C5-C6     | 120.92(12) | C4-C5-C6-C7     | -1.15(17)   |
| C6-C7            | 1.3920(16) | C5-C6-C7     | 119.26(12) | C5-C6-C7-O2     | -178.30(10) |
| C7-O2            | 1.3769(13) | O2-C7-C6     | 124.40(10) | C5-C6-C7-C2     | 1.55(16)    |
| C8-O2            | 1.4314(13) | O2-C7-C2     | 114.90(10) | C3-C2-C7-O2     | 179.01(9)   |
| C8-C9            | 1.5102(16) | C6-C7-C2     | 120.70(10) | C1-C2-C7-O2     | -0.52(14)   |
| C9-C10           | 1.5240(14) | O2-C8-C9     | 107.99(9)  | C3-C2-C7-C6     | -0.85(16)   |
| C10-C9#1         | 1.5240(13) | C8-C9-C10    | 114.17(9)  | C1-C2-C7-C6     | 179.62(10)  |
|                  |            | C9#1-C10-C9  | 112.26(12) | O2-C8-C9-C10    | -62.65(11)  |
|                  |            | C7-O2-C8     | 117.42(9)  | C8-C9-C10-C9#1  | -179.50(11) |
|                  |            |              |            | C6-C7-O2-C8     | -0.63(15)   |
|                  |            |              |            | C2-C7-O2-C8     | 179.52(9)   |
|                  |            |              |            | C9-C8-O2-C7     | 179.89(8)   |
| #1 -x+1,y,-z+3/2 |            |              |            |                 |             |
| <b>Do6OH I</b>   |            |              |            |                 |             |
| C1-O1            | 1.4276(15) | O1-C1-C2     | 112.66(11) | O1-C1-C2-C3     | 87.50(14)   |
| C1-C2            | 1.5021(18) | C3-C2-C7     | 118.58(12) | O1-C1-C2-C7     | -91.84(13)  |
| C2-C3            | 1.3898(17) | C3-C2-C1     | 120.86(12) | C7-C2-C3-C4     | -0.78(19)   |
| C2-C7            | 1.4022(17) | C7-C2-C1     | 120.56(11) | C1-C2-C3-C4     | 179.87(12)  |
| C3-C4            | 1.386(2)   | C4-C3-C2     | 121.24(13) | C2-C3-C4-C5     | -0.9(2)     |
| C4-C5            | 1.383(2)   | C5-C4-C3     | 119.43(12) | C3-C4-C5-C6     | 1.1(2)      |
| C5-C6            | 1.3928(18) | C4-C5-C6     | 120.70(13) | C4-C5-C6-C7     | 0.47(19)    |
| C6-C7            | 1.3887(17) | C7-C6-C5     | 119.37(13) | C5-C6-C7-O2     | 179.16(11)  |
| C7-O2            | 1.3687(13) | O2-C7-C6     | 123.82(11) | C5-C6-C7-C2     | -2.19(18)   |
| C8-O2            | 1.4332(14) | O2-C7-C2     | 115.53(10) | C3-C2-C7-O2     | -178.90(10) |
| C8-C9            | 1.5054(16) | C6-C7-C2     | 120.63(11) | C1-C2-C7-O2     | 0.45(16)    |
| C9-C10           | 1.5270(16) | O2-C8-C9     | 108.18(10) | C3-C2-C7-C6     | 2.34(18)    |
| C10-C10#1        | 1.522(2)   | C8-C9-C10    | 111.49(10) | C1-C2-C7-C6     | -178.31(11) |
| C11-O3           | 1.4159(15) | C10#1-C10-C9 | 112.83(13) | O2-C8-C9-C10    | -175.44(10) |
| C11-C12          | 1.5070(17) | O3-C11-C12   | 114.65(10) | C8-C9-C10-C10#1 | 177.06(12)  |
| C12-C13          | 1.3848(17) | C13-C12-C17  | 118.67(11) | O3-C11-C12-C13  | -10.45(18)  |
| C12-C17          | 1.4039(16) | C13-C12-C11  | 123.55(11) | O3-C11-C12-C17  | 168.46(11)  |
| C13-C14          | 1.3906(18) | C17-C12-C11  | 117.77(10) | C17-C12-C13-C14 | -0.44(19)   |
| C14-C15          | 1.3772(18) | C12-C13-C14  | 121.17(12) | C11-C12-C13-C14 | 178.46(12)  |
| C15-C16          | 1.3917(17) | C15-C14-C13  | 119.38(12) | C12-C13-C14-C15 | -0.2(2)     |



|                               |            |               |            |                   |             |
|-------------------------------|------------|---------------|------------|-------------------|-------------|
| C16-C17                       | 1.3888(17) | C14-C15-C16   | 120.94(12) | C13-C14-C15-C16   | 0.8(2)      |
| C17-O4                        | 1.3675(14) | C17-C16-C15   | 119.24(11) | C14-C15-C16-C17   | -0.88(19)   |
| C18-O4                        | 1.4339(14) | O4-C17-C16    | 124.80(10) | C15-C16-C17-O4    | -179.33(11) |
| C18-C19                       | 1.5056(17) | O4-C17-C12    | 114.61(10) | C15-C16-C17-C12   | 0.25(18)    |
| C19-C20                       | 1.5222(16) | C16-C17-C12   | 120.59(11) | C13-C12-C17-O4    | -179.98(11) |
| C20-C20#2                     | 1.524(2)   | O4-C18-C19    | 107.55(10) | C11-C12-C17-O4    | 1.05(16)    |
|                               |            | C18-C19-C20   | 112.34(11) | C13-C12-C17-C16   | 0.39(18)    |
|                               |            | C19-C20-C20#2 | 112.51(13) | C11-C12-C17-C16   | -178.57(11) |
|                               |            | C7-O2-C8      | 118.08(9)  | O4-C18-C19-C20    | 177.05(10)  |
|                               |            | C17-O4-C18    | 118.37(9)  | C18-C19-C20-C20#2 | -177.45(13) |
|                               |            |               |            | C6-C7-O2-C8       | -7.89(17)   |
|                               |            |               |            | C2-C7-O2-C8       | 173.39(10)  |
|                               |            |               |            | C9-C8-O2-C7       | -176.53(10) |
|                               |            |               |            | C16-C17-O4-C18    | 10.10(17)   |
|                               |            |               |            | C12-C17-O4-C18    | -169.51(10) |
|                               |            |               |            | C19-C18-O4-C17    | 172.67(10)  |
| #1 -x,-y,-z+2 #2 -x+1,-y,-z+1 |            |               |            |                   |             |
| <b>Do6OH 2</b>                |            |               |            |                   |             |
| C1-O1                         | 1.4182(16) | O1-C1-C2      | 113.78(12) | O1-C1-C2-C3       | 17.9(2)     |
| C1-C2                         | 1.500(2)   | C3-C2-C7      | 118.34(13) | O1-C1-C2-C7       | -162.92(12) |
| C2-C3                         | 1.3827(19) | C3-C2-C1      | 122.45(13) | C7-C2-C3-C4       | 0.1(2)      |
| C2-C7                         | 1.3934(19) | C7-C2-C1      | 119.20(12) | C1-C2-C3-C4       | 179.29(14)  |
| C3-C4                         | 1.381(2)   | C4-C3-C2      | 121.17(15) | C2-C3-C4-C5       | -0.1(2)     |
| C4-C5                         | 1.374(2)   | C5-C4-C3      | 119.45(14) | C3-C4-C5-C6       | 0.5(2)      |
| C5-C6                         | 1.385(2)   | C4-C5-C6      | 120.84(15) | C4-C5-C6-C7       | -0.9(2)     |
| C6-C7                         | 1.3794(19) | C7-C6-C5      | 119.09(14) | C5-C6-C7-O2       | -178.97(12) |
| C7-O2                         | 1.3738(15) | O2-C7-C6      | 123.98(12) | C5-C6-C7-C2       | 0.9(2)      |
| C8-O2                         | 1.4259(16) | O2-C7-C2      | 114.92(12) | C3-C2-C7-O2       | 179.36(11)  |
| C8-C9                         | 1.5015(19) | C6-C7-C2      | 121.10(12) | C1-C2-C7-O2       | 0.19(18)    |
| C9-C10                        | 1.5144(18) | O2-C8-C9      | 107.78(11) | C3-C2-C7-C6       | -0.56(19)   |
| C10-C10#1                     | 1.516(3)   | C8-C9-C10     | 114.22(11) | C1-C2-C7-C6       | -179.73(13) |
|                               |            | C9-C10-C10#1  | 113.08(13) | O2-C8-C9-C10      | -67.30(14)  |
|                               |            | C7-O2-C8      | 117.65(10) | C8-C9-C10-C10#1   | -178.39(14) |
|                               |            |               |            | C6-C7-O2-C8       | -3.79(18)   |
|                               |            |               |            | C2-C7-O2-C8       | 176.29(11)  |
|                               |            |               |            | C9-C8-O2-C7       | -177.73(10) |
| #1 -x,-y+1,-z+1               |            |               |            |                   |             |

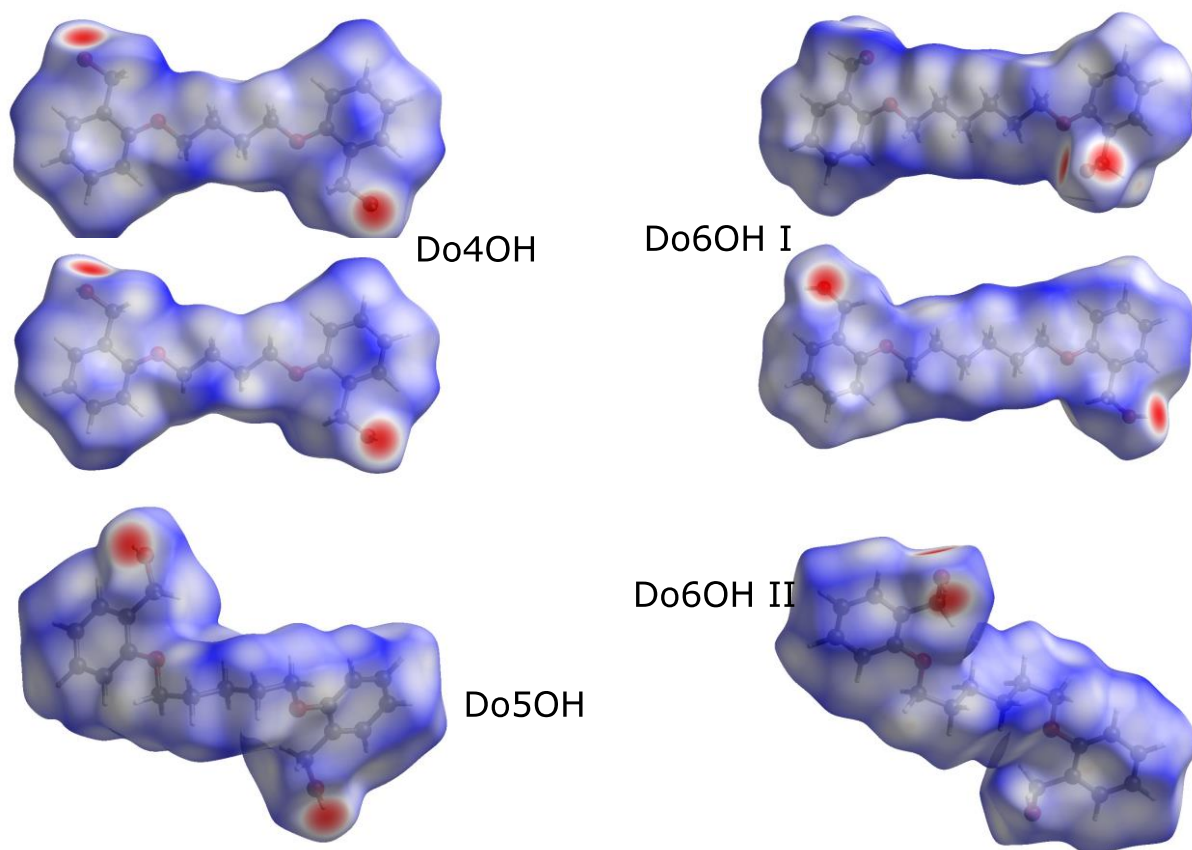

**Figure S3.** Hirshfeld surfaces for **Do4OH**, **Do5OH**, **Do6OH I** and **Do6OH II** plotted over  $d_{\text{norm}}$ . In case of **Do4OH** and **Do6OH I**, two symmetry independent molecules are present in the structure and hence HS of both are depicted.

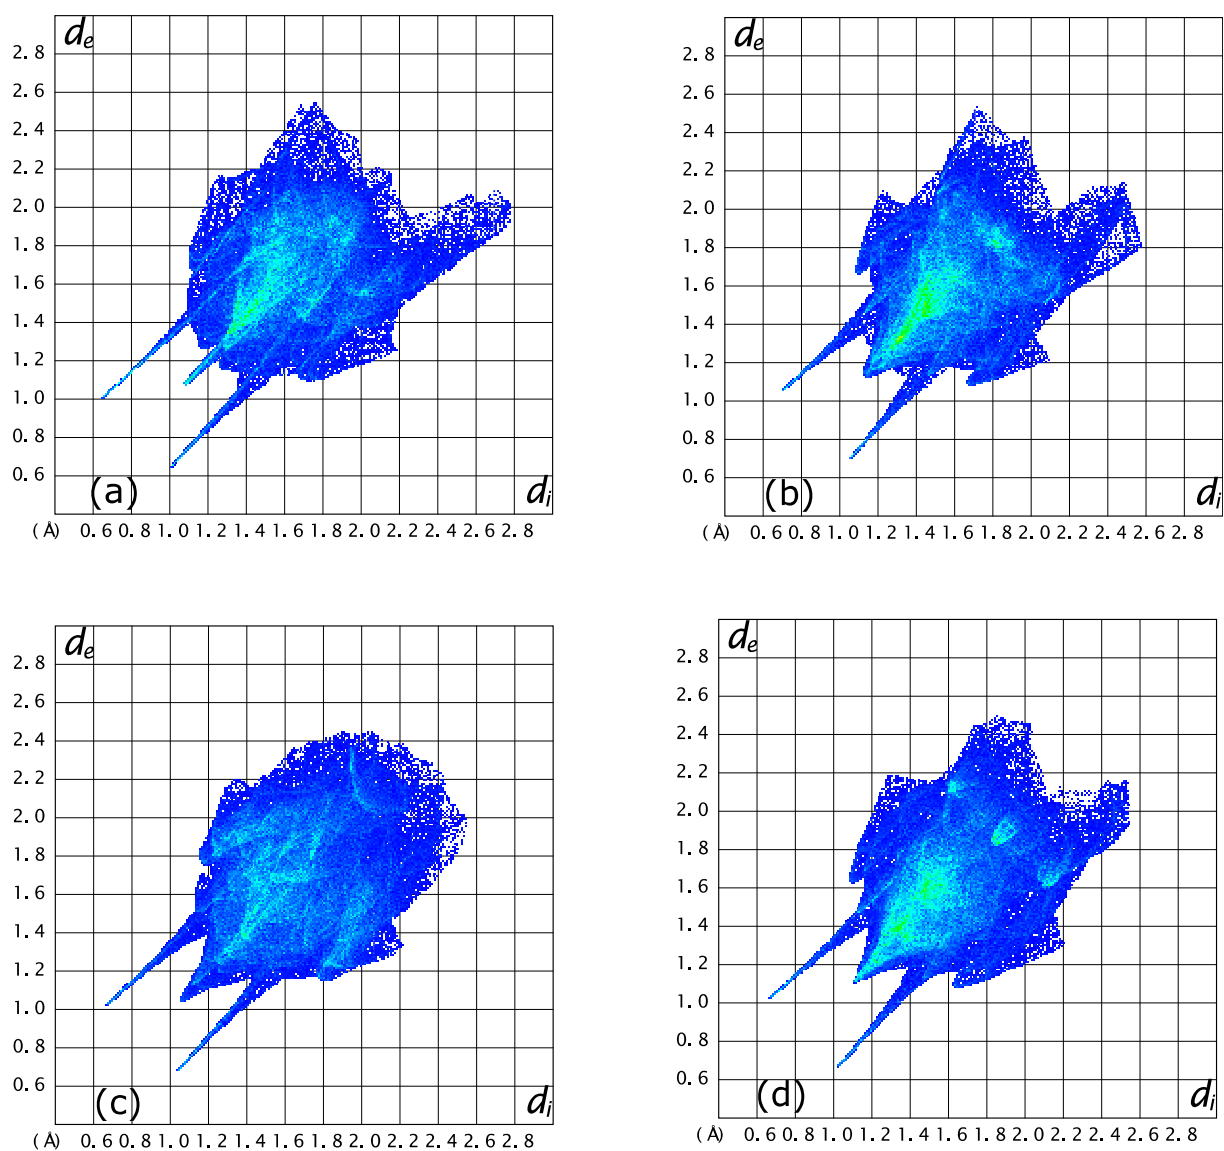

**Figure S4.** The full 2D fingerprint plots of (a) Do4OH, (b) Do5OH, (c) Do6OH I and (d) Do6OH II.

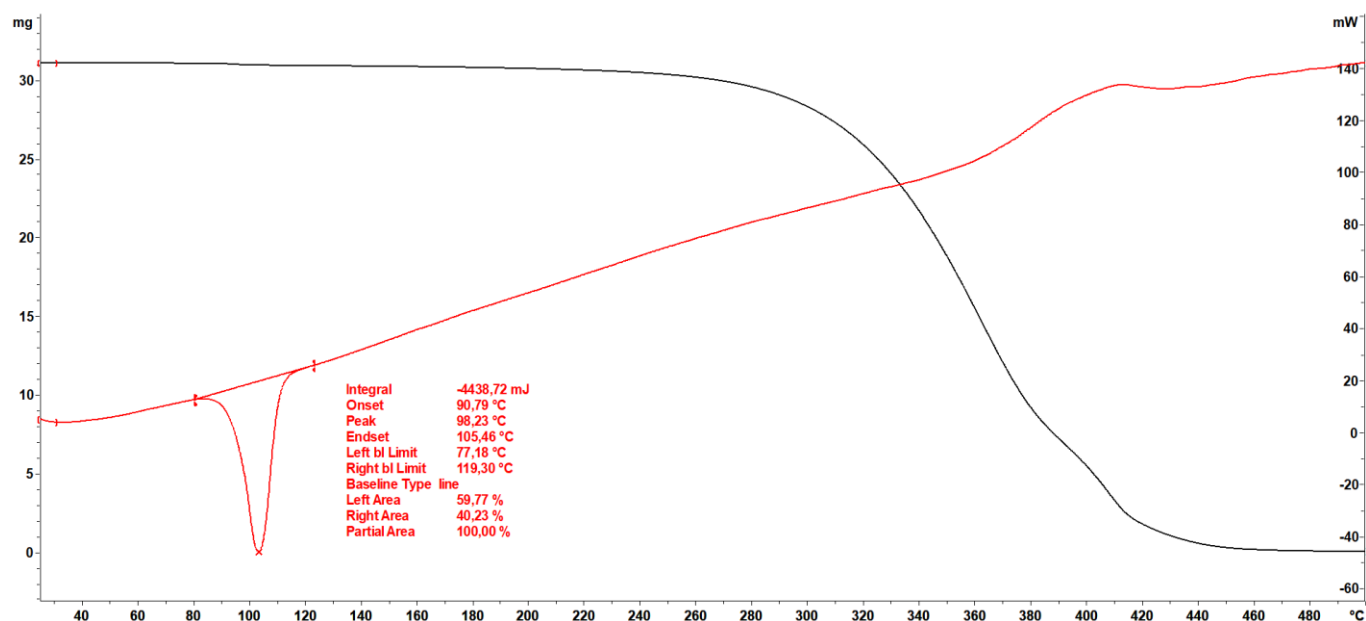

Figure S5. TG (black) and DSC (red) curves of Do4OH.

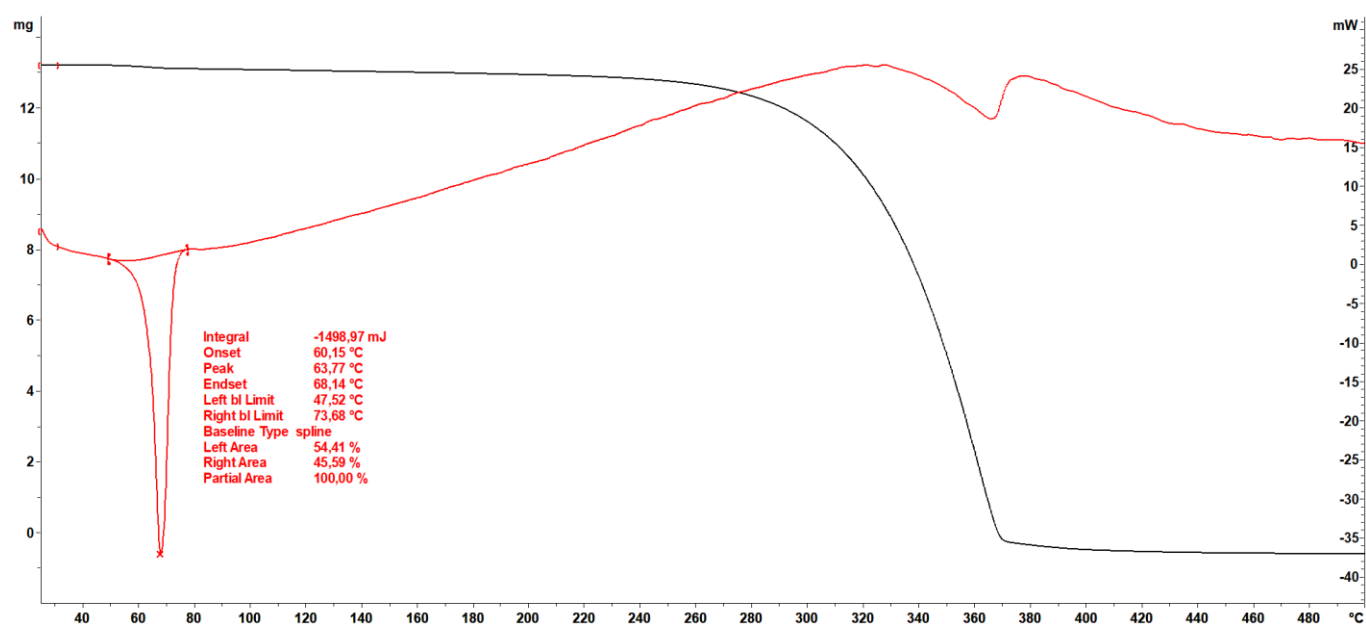

Figure S6. TG (black) and DSC (red) curves of Do5OH.

Table S3. Thermodynamic data of the DSC measurements for Do4OH, Do5OH and Do6OH (Forms I and II).

| Compound               | $T_{fus}/K$ | $\Delta H_{fus}/kJ\ mol^{-1}$ | $\Delta S_{fus}/kJ\ mol^{-1}\ K^{-1}$ |
|------------------------|-------------|-------------------------------|---------------------------------------|
| <b>Do4OH</b>           | 371.38      | 42.6                          | 0.115                                 |
| <b>Do5OH</b>           | 336.92      | 37.33                         | 0.111                                 |
| <b>Do6OH I (DMF)</b>   | 336.09      | 17.84                         | 0.053                                 |
| <b>Do6OH II (DMSO)</b> | 333.07      | 27.09                         | 0.081                                 |

$T_{fus}$  – melting point

$\Delta H_{fus}$  – enthalpy of fusion

$\Delta S_{fus}$  – entropy of fusion

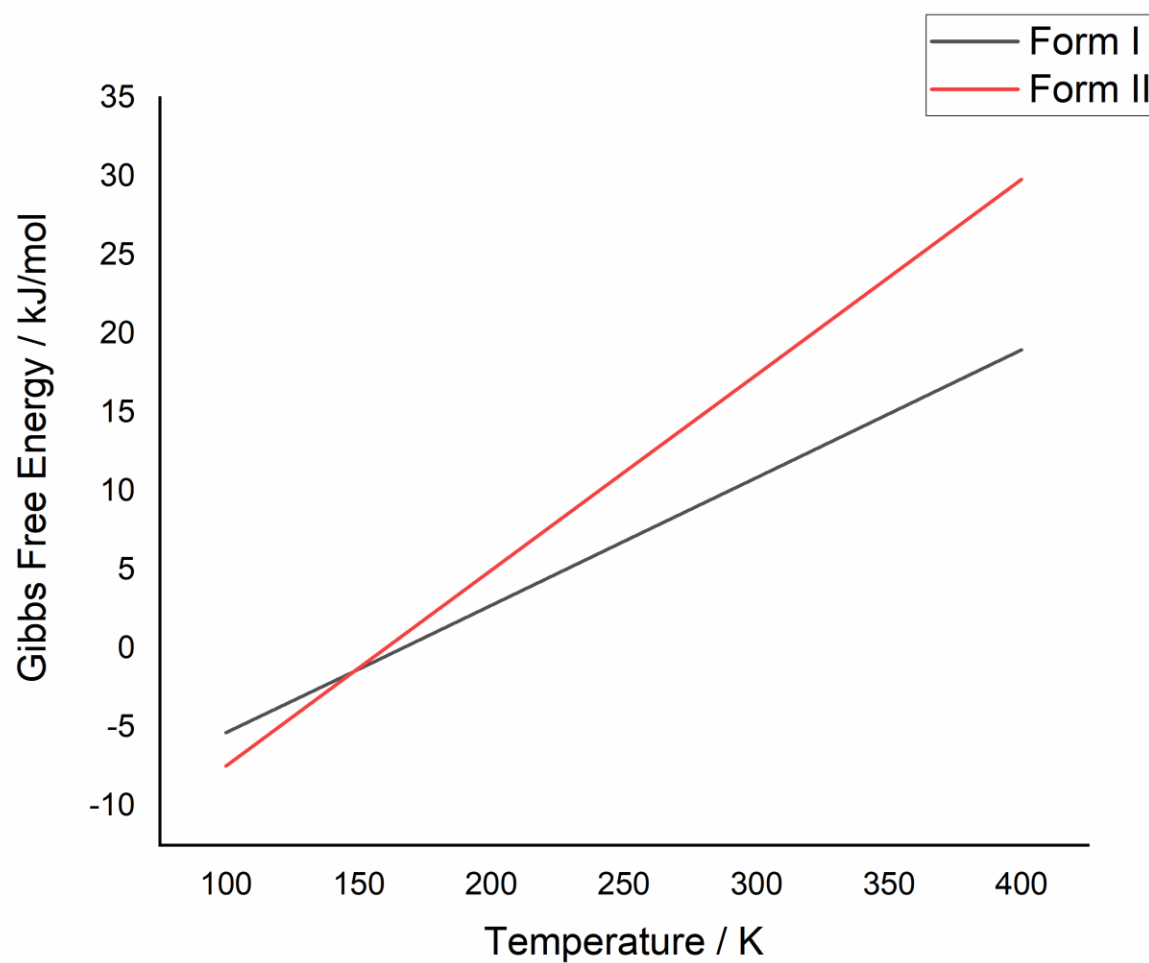

**Figure S7.** Linear Gibbs free energy functions for **Forms I** and **II**.

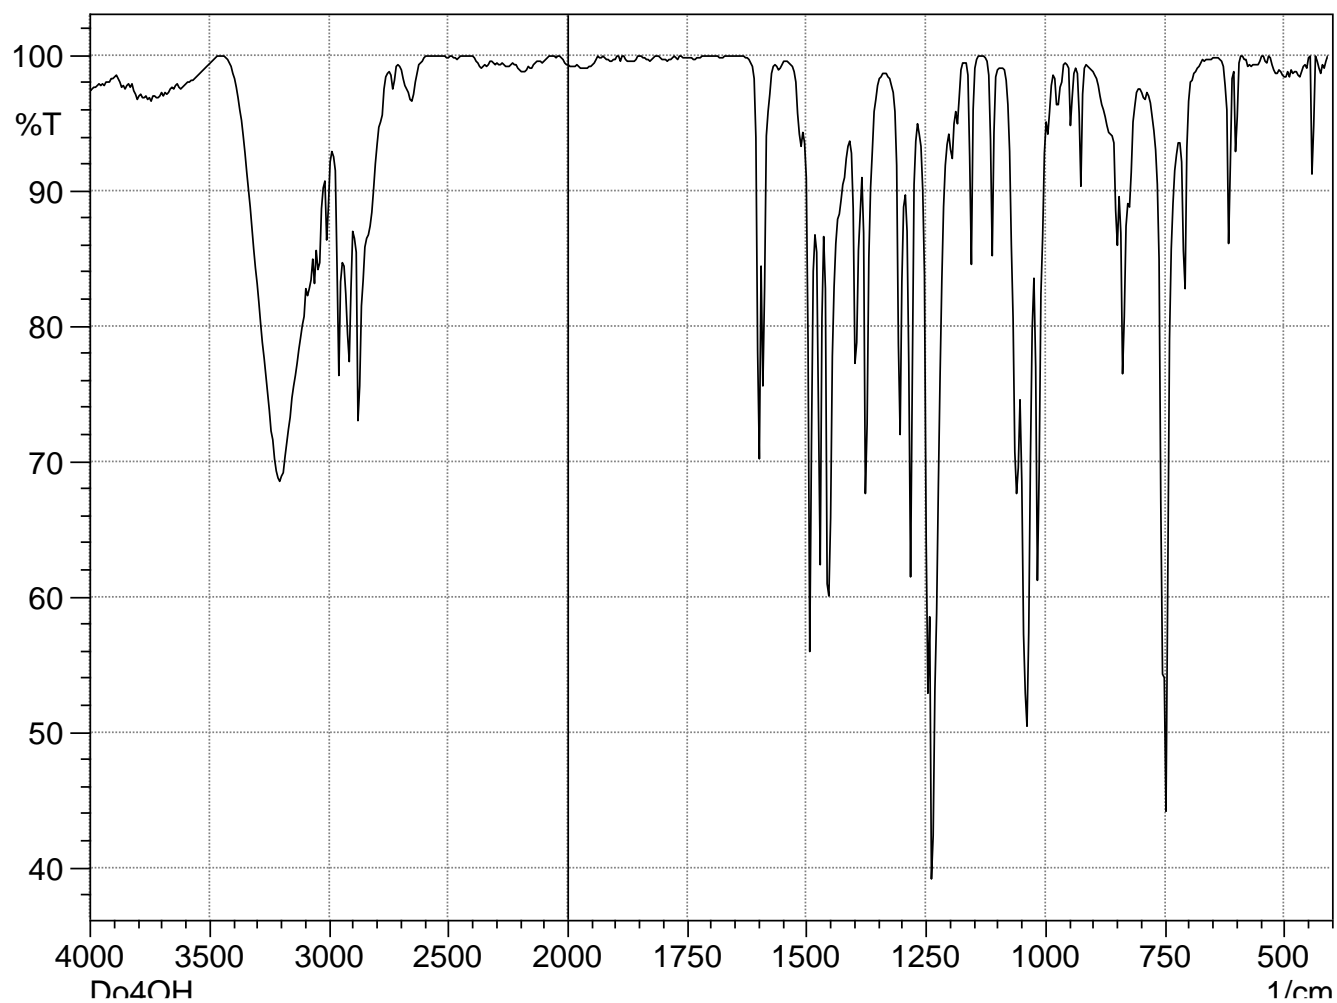

Figure S8. IR spectrum of **Do4OH**.

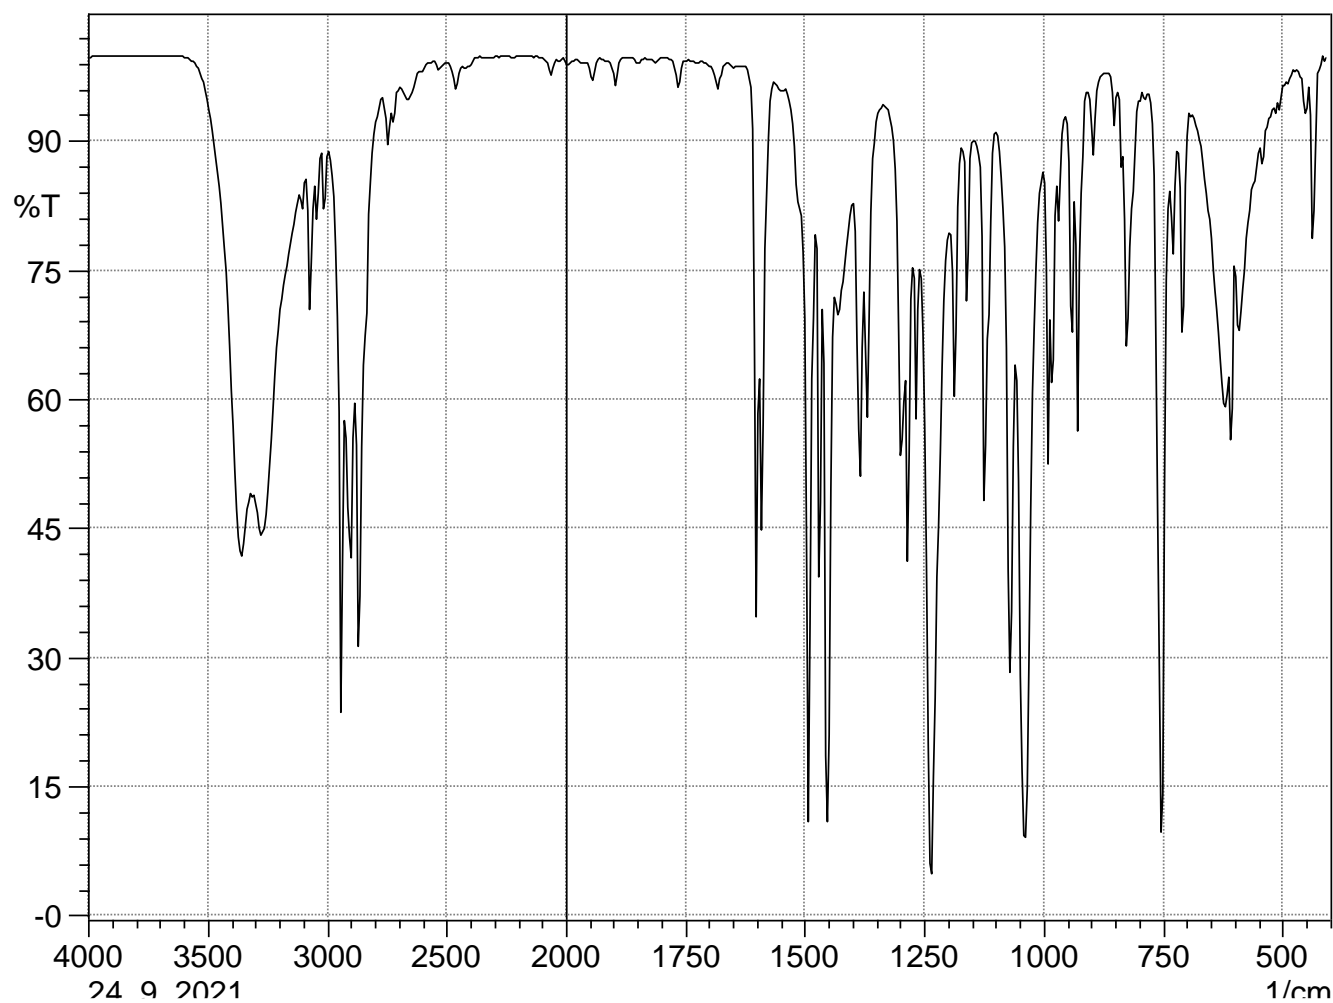

Figure S9. IR spectrum of Do5OH.

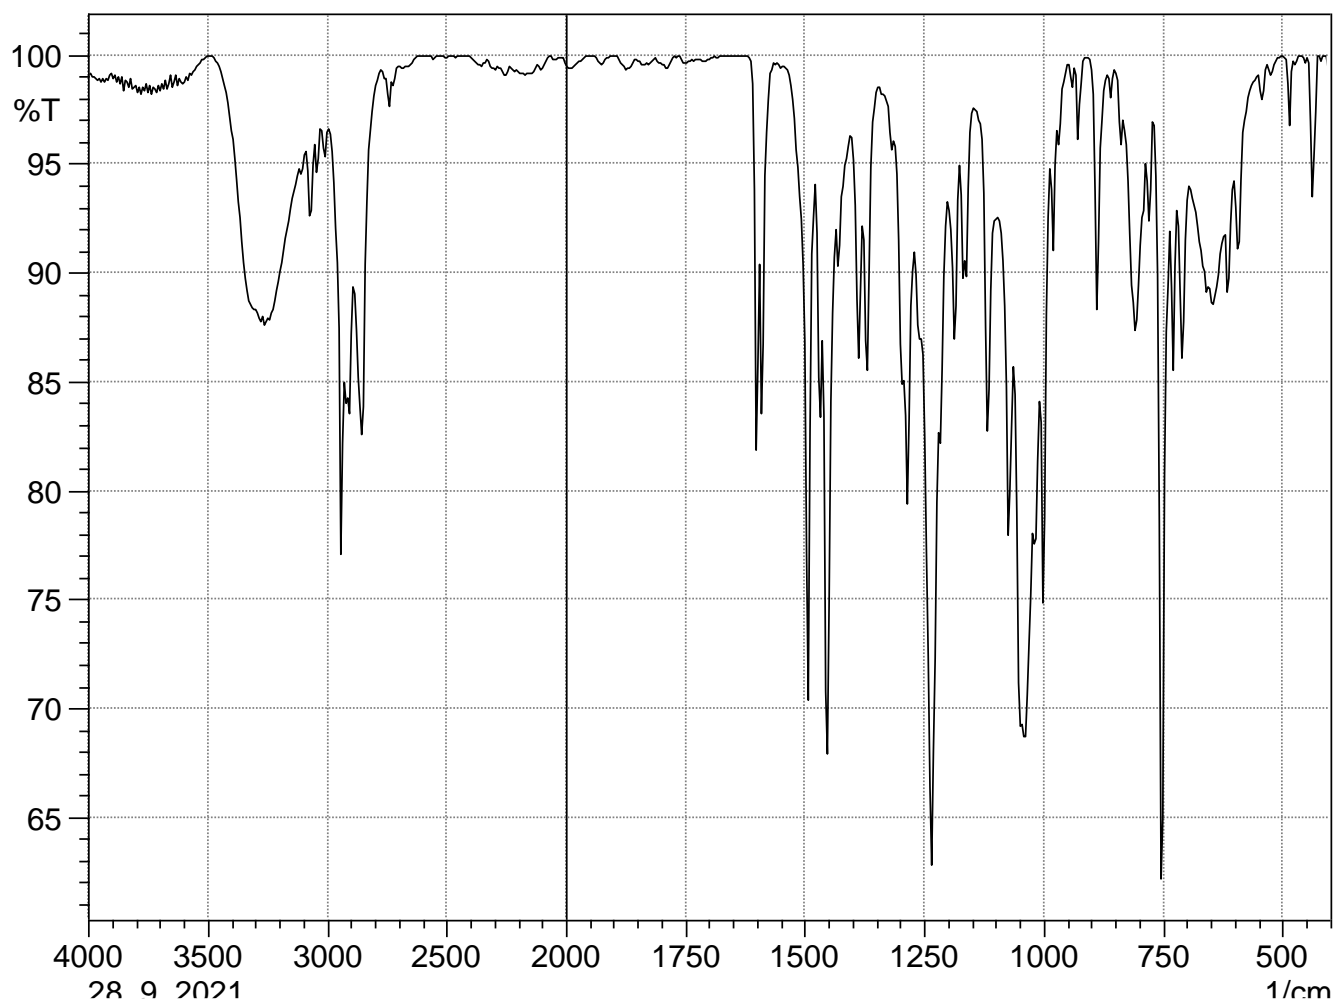

Figure S10. IR spectrum of **Do6OH I**



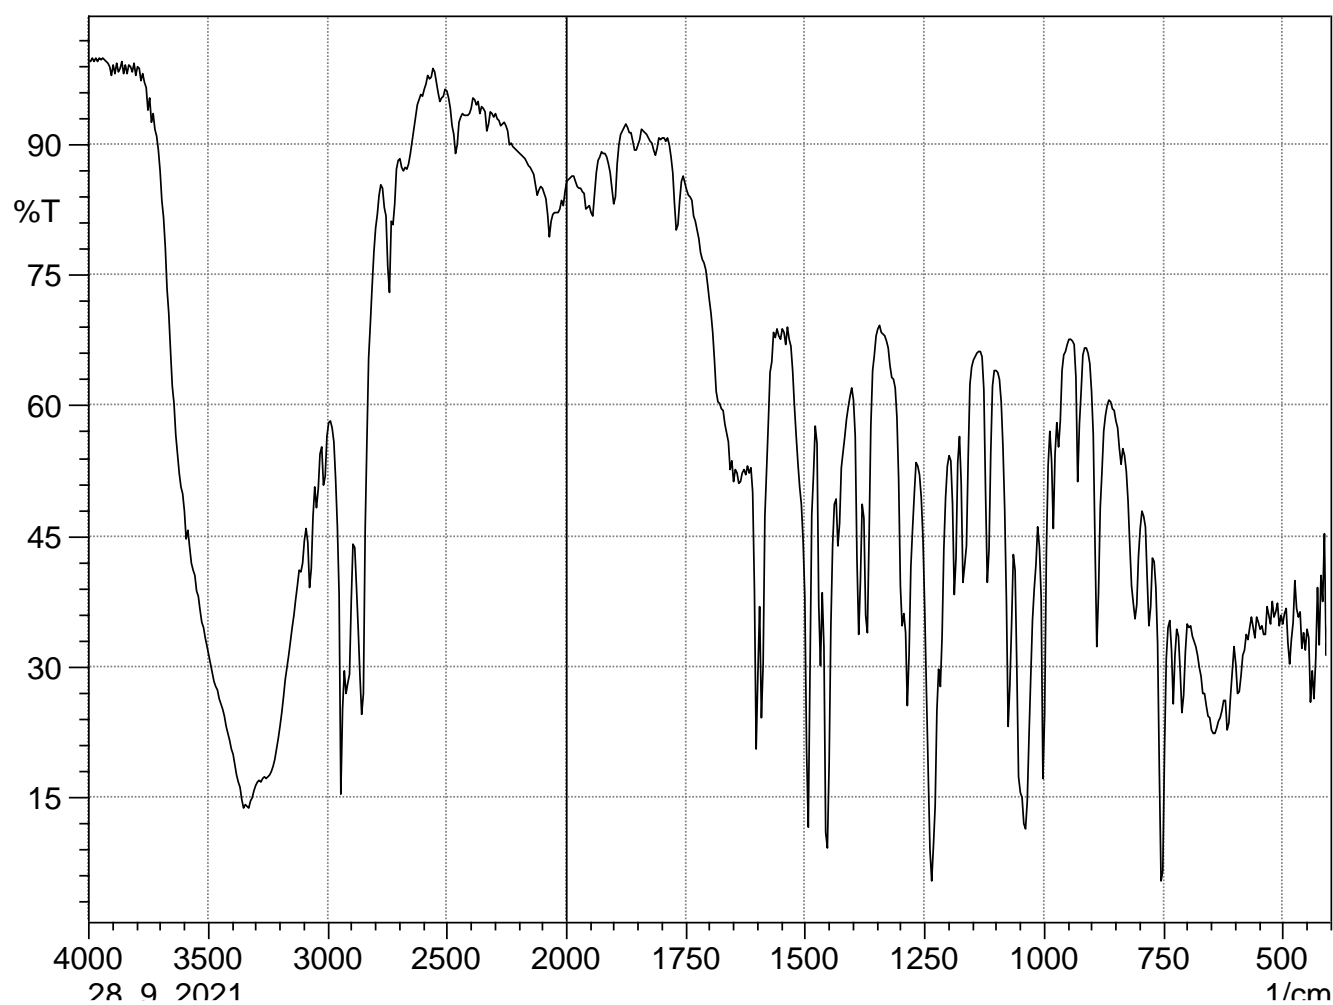

Figure S11. IR spectrum of **Do6OH II**

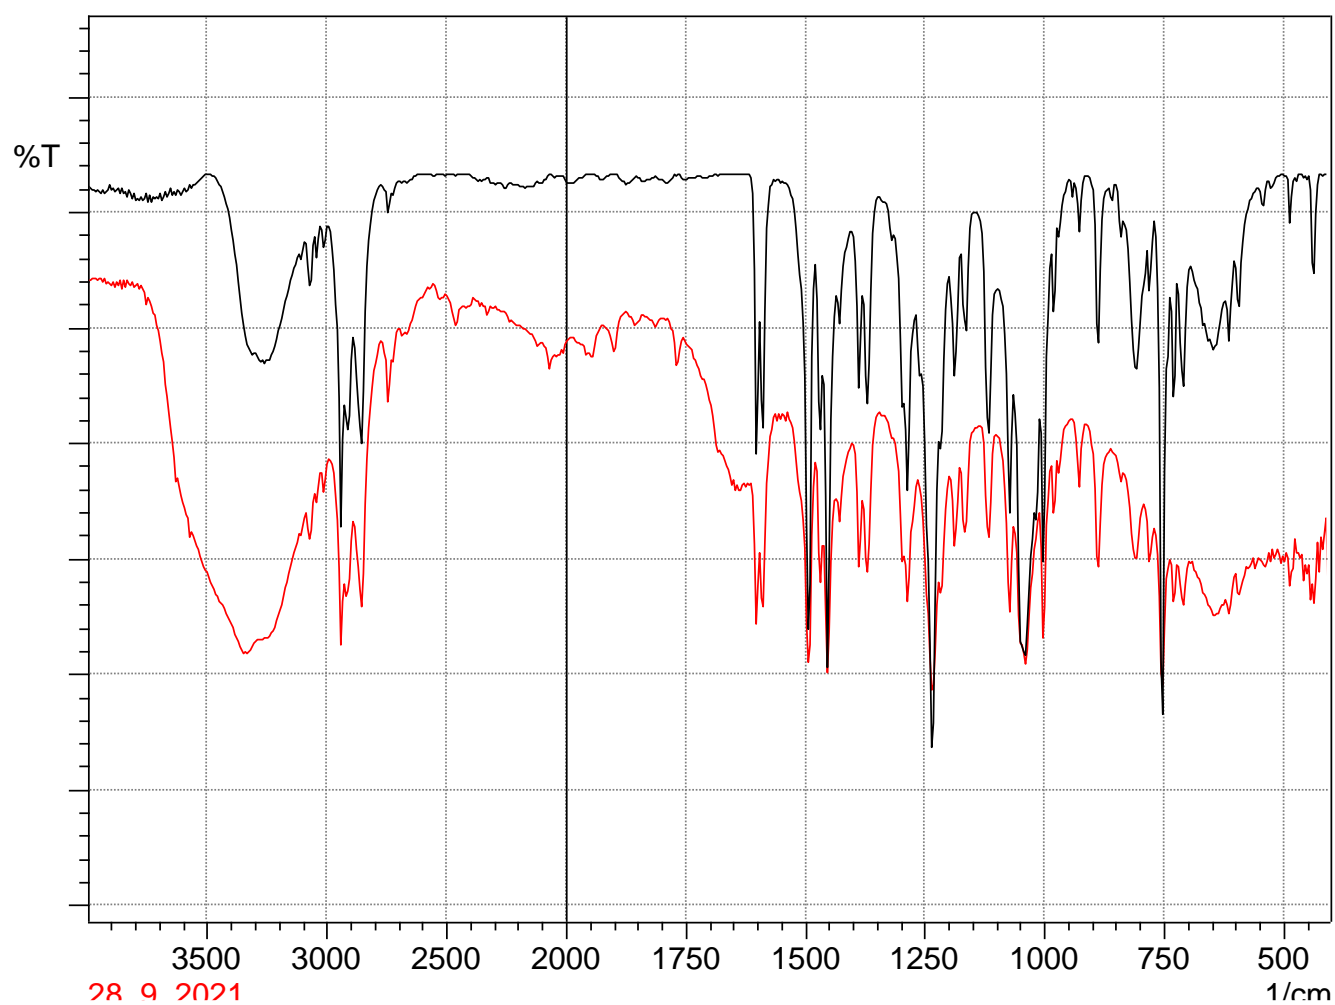

Figure S12. Spectra overlay of Do6OH I (black) and II (red)

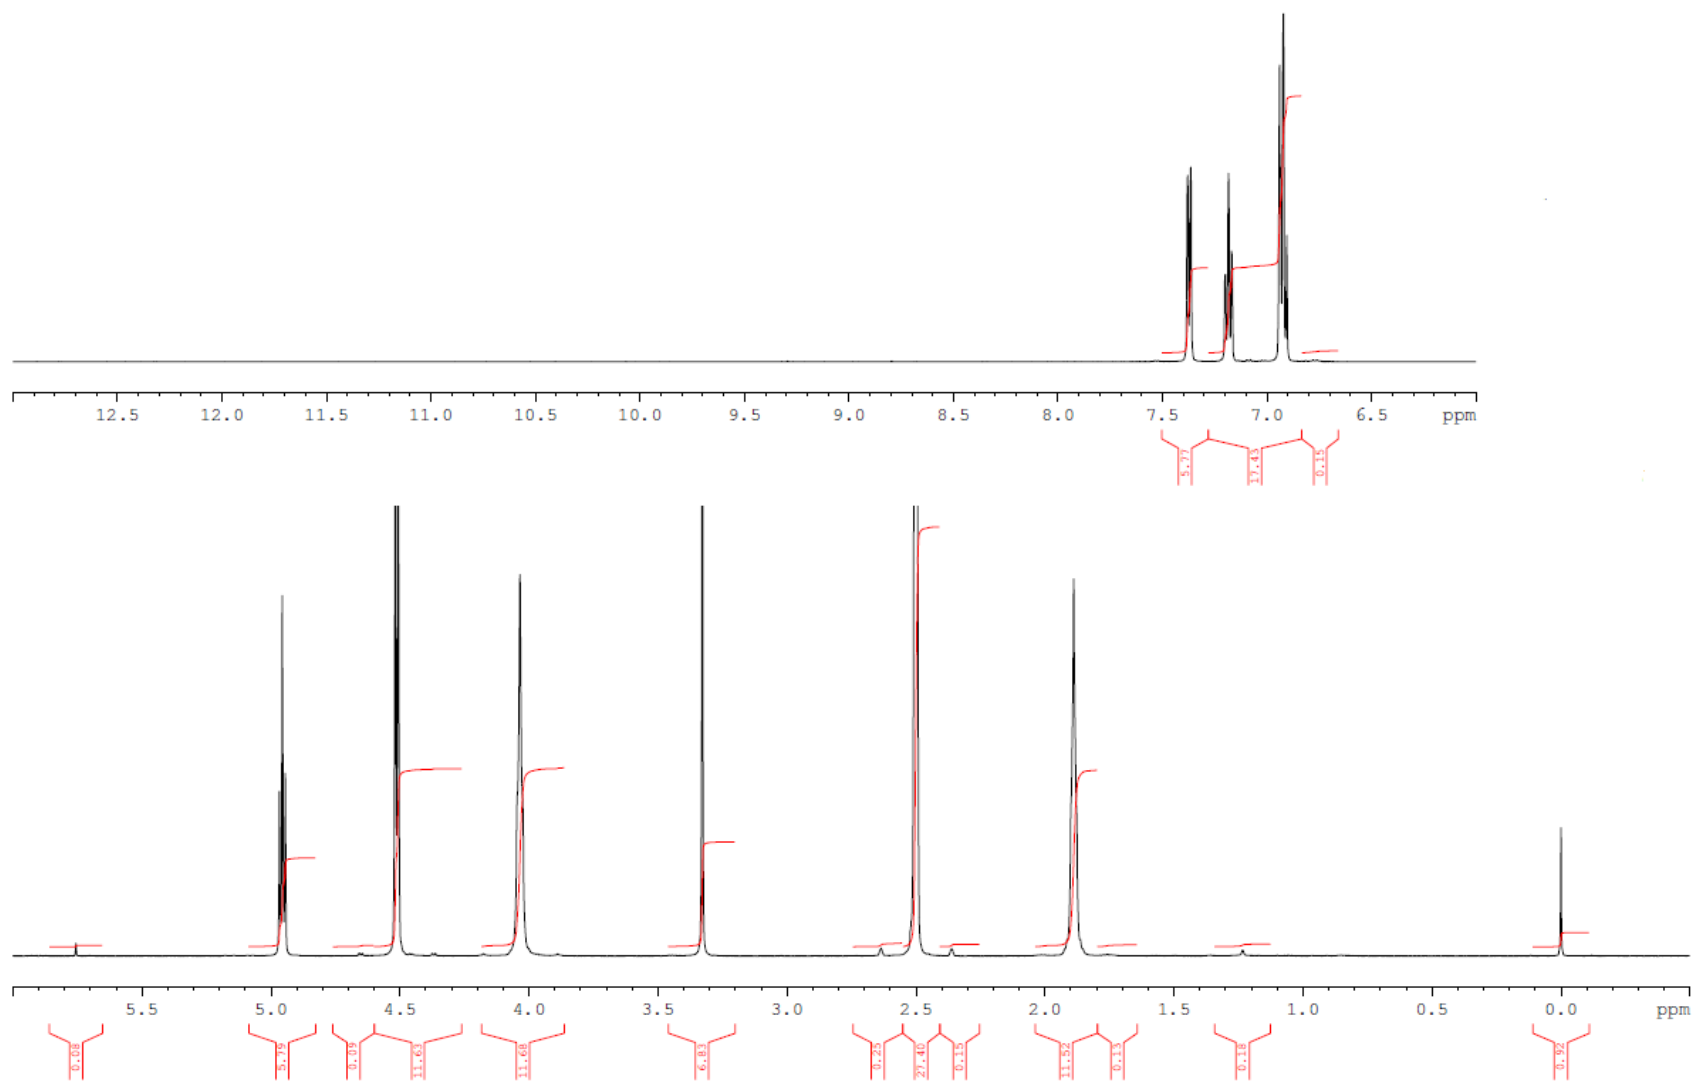

Figure S13.  $^1\text{H}$  NMR spectra of Do4OH

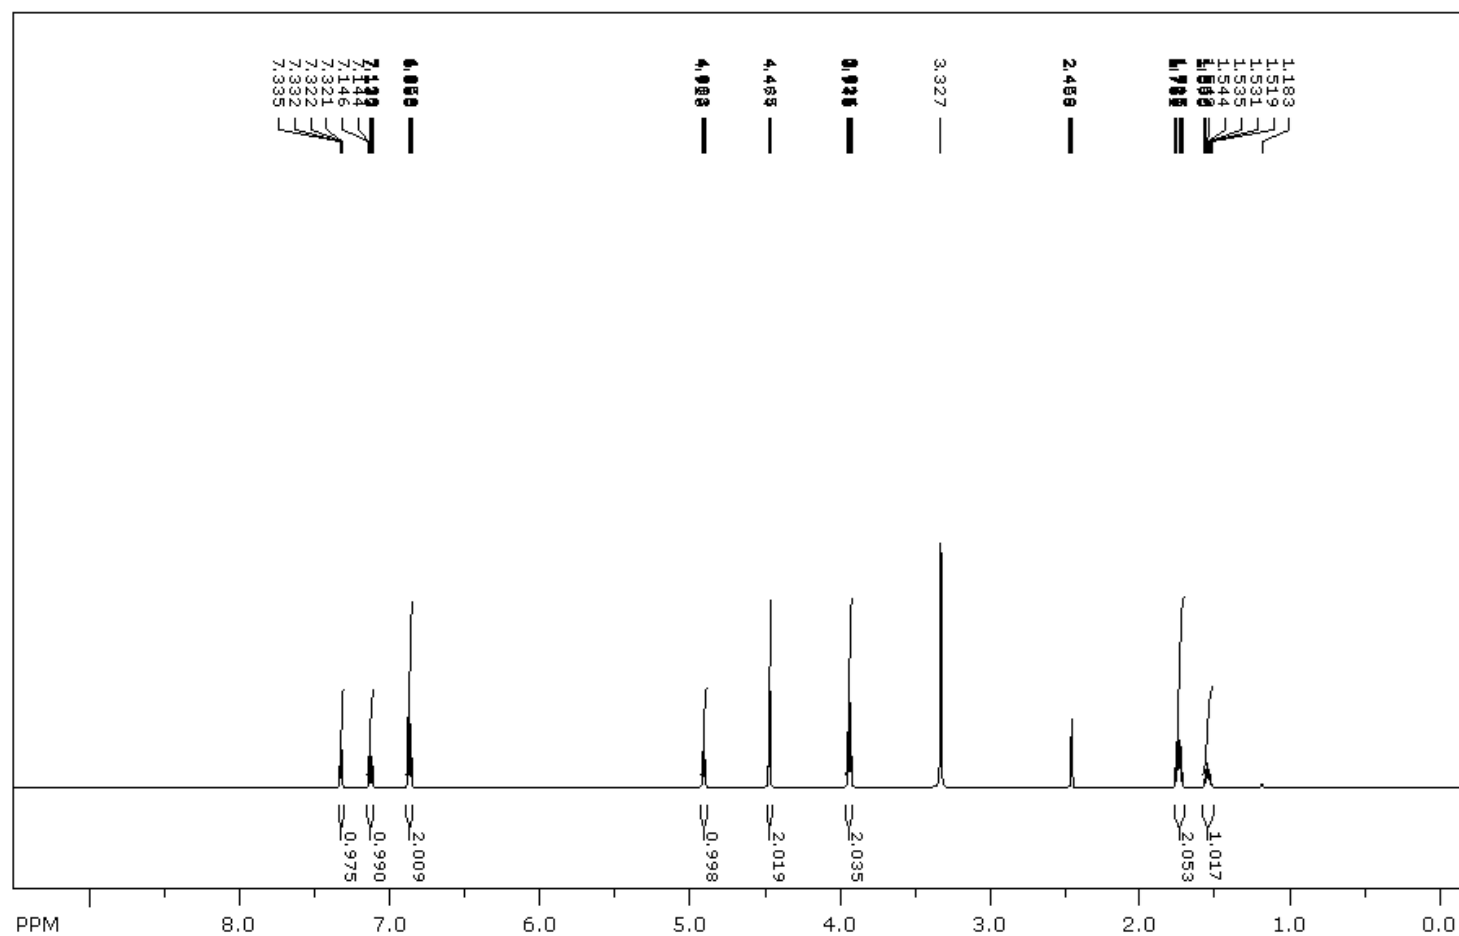

Figure S14. <sup>1</sup>H NMR spectra of Do5OH

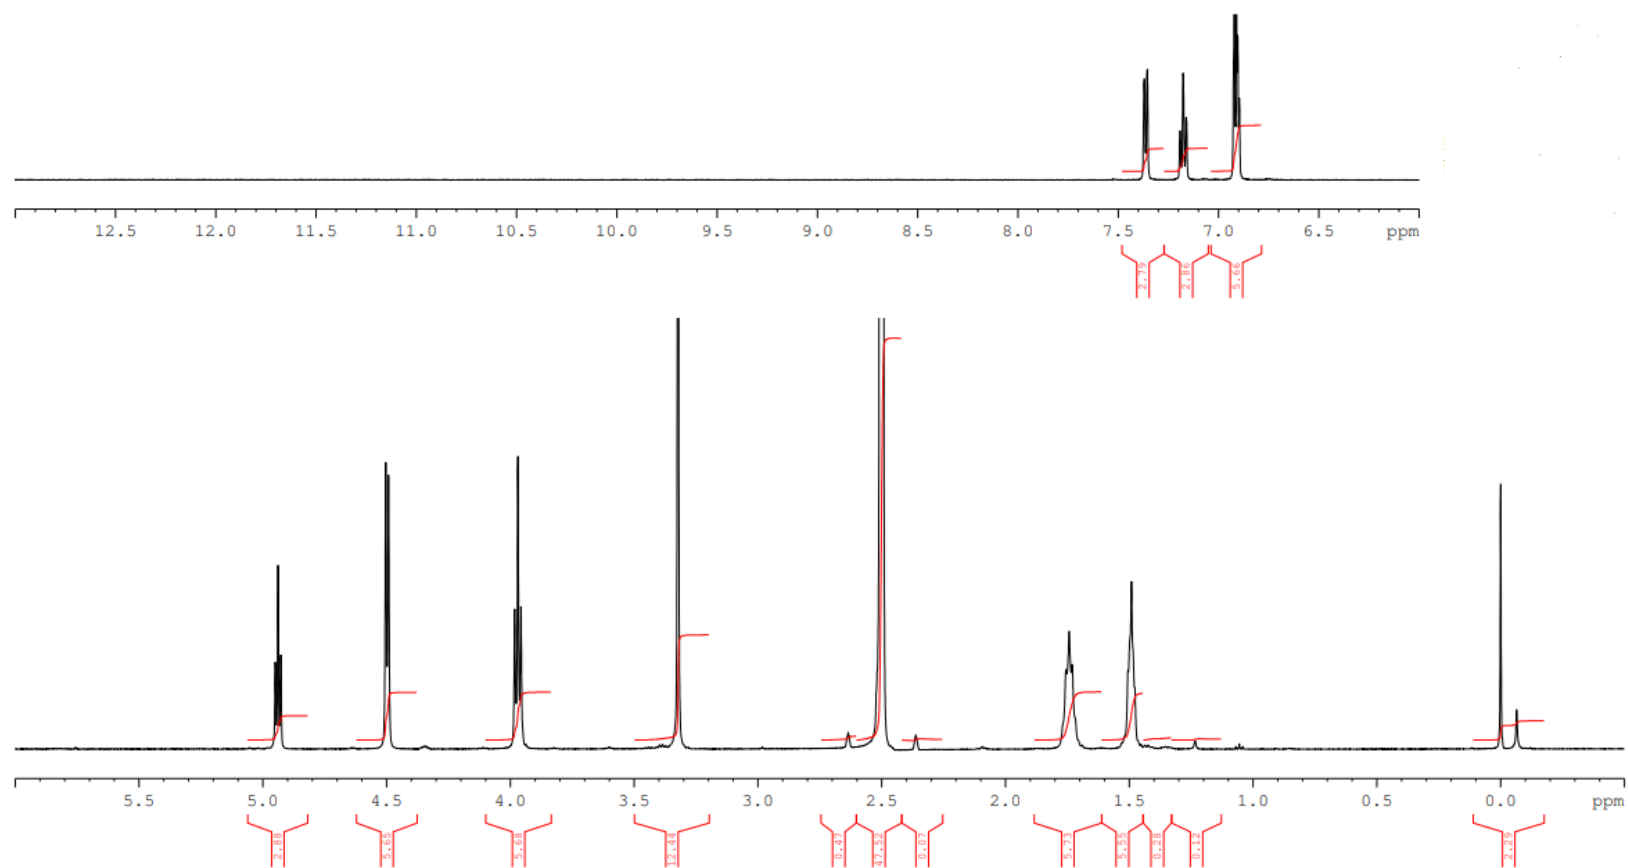

Figure S15.  $^1\text{H}$  NMR spectra of Do6OH

**Table S4.** Molecular pairs interaction energies (kJ/mol) for **Do4OH**.

| N | Symop             | R     | E_ele    | E_pol  | E_dis    | E_rep   | E_tot    |
|---|-------------------|-------|----------|--------|----------|---------|----------|
| 2 | -                 | 9.93  | -3.3824  | -0.74  | -19.162  | 6.5508  | -16.7336 |
| 2 | -                 | 9.27  | -58.3464 | -9.028 | -12.6295 | 46.659  | -33.3449 |
| 4 | -x, y+1/2, -z+1/2 | 12.86 | -2.114   | -0.222 | -1.8291  | 0.0618  | -4.1033  |
| 1 | -                 | 12.71 | -2.7482  | -0.296 | -9.8423  | 4.8822  | -8.0043  |
| 2 | -                 | 8.91  | -58.5578 | -9.25  | -12.5424 | 47.4624 | -32.8878 |
| 2 | -x+1/2, y, -z     | 12.85 | 0.1057   | -0.074 | -2.1775  | 0.309   | -1.8368  |
| 2 | -                 | 9.59  | -4.9679  | -0.888 | -20.8169 | 7.7868  | -18.886  |

|   |                   |       |          |        |          |         |          |
|---|-------------------|-------|----------|--------|----------|---------|----------|
| 1 | -                 | 12.44 | -2.5368  | -0.37  | -10.6262 | 4.8204  | -8.7126  |
| 2 | x, y, z           | 5.02  | -17.6519 | -3.7   | -72.3801 | 30.1584 | -63.5736 |
| 2 | -x+1/2, y, -z     | 12.61 | 0.2114   | 0      | -1.3065  | 0.0618  | -1.0333  |
| 4 | -x, y+1/2, -z+1/2 | 13.1  | -2.0083  | -0.222 | -1.6549  | 0.0618  | -3.8234  |

N – number of molecules in contact; Symop – symmetry operation; R – centroid distance between molecules; E\_ele – electrostatic interaction energy, E\_pol – polarization interaction energy, E\_dis – dispersion interaction energy, E\_rep – repulsive interaction energy, E\_tot – total interaction energy.

**Table S5.** Molecular pairs interaction energies (kJ/mol) for **Do5OH**.

| N | Symop                | R     | E_ele   | E_pol  | E_dis    | E_rep   | E_tot    |
|---|----------------------|-------|---------|--------|----------|---------|----------|
| 2 | x, y, z              | 4.71  | -16.701 | -2.368 | -73.4253 | 29.8494 | -62.6445 |
| 4 | x+1/2, y+1/2, -z+1/2 | 12.67 | -48.516 | -7.548 | -17.0716 | 38.3778 | -34.7581 |
| 2 | -x, -y, -z           | 7.07  | -9.513  | -1.258 | -40.1531 | 18.7872 | -32.1369 |

|   |                          |       |         |        |          |        |         |
|---|--------------------------|-------|---------|--------|----------|--------|---------|
| 2 | -x, -y, -z               | 8.84  | 1.1627  | -0.518 | -12.0198 | 2.2866 | -9.0885 |
| 4 | -x+1/2, -y+1/2,<br>z+1/2 | 14.40 | 1.2684  | -0.222 | -2.613   | 0.2472 | -1.3194 |
| 2 | -x, -y, -z               | 8.14  | -7.7161 | -1.48  | -16.1135 | 7.8486 | -17.461 |

N – number of molecules in contact; Symop – symmetry operation; R – centroid distance between molecules; E\_ele – electrostatic interaction energy, E\_pol - polarization interaction energy, E\_dis - dispersion interaction energy, E\_rep - repulsive interaction energy, E\_tot - total interaction energy.

**Table S6.** Molecular pairs interaction energies (kJ/mol) for **Do6OH I**.

| N | Symop             | R     | E_ele    | E_pol   | E_dis    | E_rep   | E_tot    |
|---|-------------------|-------|----------|---------|----------|---------|----------|
| 2 | -                 | 6.99  | -60.5661 | -10.878 | -27.9591 | 49.8108 | -49.5924 |
| 2 | -                 | 7.17  | -11.8384 | -1.702  | -31.6173 | 16.3152 | -28.8425 |
| 4 | -x, y+1/2, -z+1/2 | 10.89 | -7.8218  | -1.036  | -16.8103 | 5.3766  | -20.2915 |
| 2 | -                 | 11.85 | -47.7764 | -7.548  | -10.2778 | 39.4902 | -26.112  |



|   |         |      |          |        |          |        |          |
|---|---------|------|----------|--------|----------|--------|----------|
| 2 | x, y, z | 7.54 | -22.0913 | -2.294 | -74.2963 | 35.226 | -63.4556 |
|---|---------|------|----------|--------|----------|--------|----------|

N – number of molecules in contact; Symop – symmetry operation; R – centroid distance between molecules; E\_ele – electrostatic interaction energy, E\_pol - polarization interaction energy, E\_dis - dispersion interaction energy, E\_rep - repulsive interaction energy, E\_tot - total interaction energy.

**Table S7.** Molecular pairs interaction energies (kJ/mol) for **D<sub>6</sub>OH II**.

| N | Symop             | R     | E_ele   | E_pol  | E_dis    | E_rep   | E_tot    |
|---|-------------------|-------|---------|--------|----------|---------|----------|
| 4 | x+1/2, -y+1/2, -z | 10.00 | -3.8052 | -0.74  | -8.9713  | 4.326   | -9.1905  |
| 4 | x+1/2, -y+1/2, -z | 7.56  | -3.171  | -0.74  | -28.1333 | 10.506  | -21.5383 |
| 4 | -x, y+1/2, -z+1/2 | 15.79 | 1.2684  | -0.148 | -2.1775  | 0.1236  | -0.9335  |
| 2 | x, y, z           | 4.63  | -16.595 | -2.294 | -73.8608 | 29.8494 | -62.9003 |
| 4 | -x+1/2, -y, z+1/2 | 13.47 | -55.175 | -8.214 | -15.9393 | 45.3612 | -33.9675 |

N – number of molecules in contact; Symop – symmetry operation; R – centroid distance between molecules; E\_ele – electrostatic interaction energy, E\_pol - polarization interaction energy, E\_dis - dispersion interaction energy, E\_rep - repulsive interaction energy, E\_tot - total interaction energy.
